# Supplementary material for: Randomized, double-blind, placebo-controlled trial of ISC 17536, an oral inhibitor of transient receptor potential ankyrin 1, in patients with painful diabetic peripheral neuropathy: impact of preserved small nerve fiber function
Source: PubMed Central journal article supplement — Pain. 2021 Sep 2;163(6):e738–47. doi: 10.1097/j.pain.0000000000002470 (PMC9100440; doi:10.1097/j.pain.0000000000002470), 2021-09-02
Supplement: jop-163-e738-s001.pdf [file jop-163-e738-s001.pdf]

## Supplementary material 01

### Inclusion Criteria

| Inclusion criteria                                                                                                                                                                                                                                                                                                                                                                                                                                                                                                                                                                                                                                                                                                                                                                                                                                                                                                                                                                                                                                                                                                                                                                                                                                                                                                                                                                                                                                                                                                                                                                                                                                                                                                                                                                                                                                                                                                                                                                                                                                                                                                                                                                  | Exclusion Criteria                                                                                                                                                                                                                                                                                                                                                                                                                                                                                                                                                                                                                                                                                                                                                                                                                                                                                                                                                                                                                                                                                                                                                                                                                                                                                                                                                                                                                                                                                                                                                                                                                                                                                                                              |
|-------------------------------------------------------------------------------------------------------------------------------------------------------------------------------------------------------------------------------------------------------------------------------------------------------------------------------------------------------------------------------------------------------------------------------------------------------------------------------------------------------------------------------------------------------------------------------------------------------------------------------------------------------------------------------------------------------------------------------------------------------------------------------------------------------------------------------------------------------------------------------------------------------------------------------------------------------------------------------------------------------------------------------------------------------------------------------------------------------------------------------------------------------------------------------------------------------------------------------------------------------------------------------------------------------------------------------------------------------------------------------------------------------------------------------------------------------------------------------------------------------------------------------------------------------------------------------------------------------------------------------------------------------------------------------------------------------------------------------------------------------------------------------------------------------------------------------------------------------------------------------------------------------------------------------------------------------------------------------------------------------------------------------------------------------------------------------------------------------------------------------------------------------------------------------------|-------------------------------------------------------------------------------------------------------------------------------------------------------------------------------------------------------------------------------------------------------------------------------------------------------------------------------------------------------------------------------------------------------------------------------------------------------------------------------------------------------------------------------------------------------------------------------------------------------------------------------------------------------------------------------------------------------------------------------------------------------------------------------------------------------------------------------------------------------------------------------------------------------------------------------------------------------------------------------------------------------------------------------------------------------------------------------------------------------------------------------------------------------------------------------------------------------------------------------------------------------------------------------------------------------------------------------------------------------------------------------------------------------------------------------------------------------------------------------------------------------------------------------------------------------------------------------------------------------------------------------------------------------------------------------------------------------------------------------------------------|
| <p>Subjects eligible for enrolment in the study had to meet all of the following criteria:</p> <ol style="list-style-type: none"><li>1. Subjects who were willing to provide voluntary written informed consent.</li><li>2. Male and female (post-menopausal or surgically-sterile) subjects aged <math>\geq 18</math> and <math>\leq 75</math> years (<math>\geq 18</math> and <math>\leq 65</math> years in India only).</li><li>3. Subjects with diabetes mellitus (Type 1 or 2) with distal symmetric chronic sensorimotor painful peripheral neuropathy.</li><li>4. A history of pain for at least 6 months and no greater than 5 years attributed to DPN (this requirement refers to duration of pain, not the duration of DPN).</li><li>5. A Douleur Neuropathique en 4 questions (DN4) score of <math>\geq 4</math>.</li><li>6. A baseline 24-hour API score <math>\geq 4</math> and <math>&lt; 9</math> measured on an 11-point pain intensity NRS.<br/>Note 1: The baseline score was calculated as the mean of the 24-hour daily average pain scores during the 7 days prior to randomization. Note 2: Because some early versions of the protocol specified baseline 24-hour API score <math>\geq 5</math>, a limited number of subjects who had a baseline 24-hour API score <math>\geq 4</math> and <math>&lt; 5</math> were permitted to undergo rescreening using the baseline 24-hour API score criteria of <math>\geq 4</math> and <math>&lt; 9</math> in the final version of the protocol (see Figure 2 and Appendix 16.1.1).</li><li>7. Pain uncontrolled with up to a maximum of 2 medications for the treatment of pain associated with DPN. The subject's medical history could indicate that the pain was not controlled with:<ul style="list-style-type: none"><li>• 1 medication for painful DPN; or</li><li>• 2 medications for painful DPN taken over different time-periods in the past; or</li><li>• 2 medications for painful DPN taken over the same time periods in the past (ie., combination therapy using 2 drugs).</li></ul></li><li>8. Subjects were willing to discontinue their neuropathy medications for the duration of study</li></ol> | <ol style="list-style-type: none"><li>1. Subjects with a 24-hour daily API of <math>\geq 9</math> on the 11-point NRS at Visit 1 or Visit 3.</li><li>2. Other chronic pain conditions not associated with DPN that could confound the assessment of neuropathic pain. The subject was not excluded if the pain condition was located at a different region of the body (other than lower limbs); the pain intensity of the condition was not greater than the pain intensity of DPN; and the subject could assess pain due to DPN independently of the other pain condition.</li><li>3. Subjects with other causes of neuropathy or lower extremity pain which may include, but was not limited to:<ul style="list-style-type: none"><li>• Lower extremity pain of any severity caused by osteoarthritis of the ankle or foot, gout, bursitis, or fasciitis.</li><li>• Past medical history or known current medical condition of diffuse peripheral neuropathy caused by alcoholism, malignancy, human immunodeficiency virus (HIV), syphilis, drug abuse, peripheral ischaemia, Vitamin B12 deficiency, abnormal folate, hypothyroidism, liver disease, chemotherapy, or radiation therapy. Subjects with folate or vitamin B12 levels below the laboratory reference range or thyroid stimulating hormone (TSH) level above the laboratory reference range were excluded.</li><li>• Focal neuropathy in the lower extremities including nerve entrapment or local trauma</li><li>• Acute or chronic inflammatory polyradiculopathy.</li><li>• Multiple sclerosis or other conditions associated with central neuropathic pain.</li><li>• Pain associated with distal limb ischaemia including intermittent claudication.</li></ul></li></ol> |

beginning with the washout period and continuing through the end of study visit (Visit 8).

9. For subjects with a glycosylated haemoglobin (HbA1c) value < 8%, stable glycaemic control for 3 months before randomization defined by:

- Insulin: < 25% change in the mean current insulin dose to maintain glycaemic control.
- Oral antidiabetic agents: < 50% change in the current oral dose to maintain glycaemic control.
- Addition of up to 1 oral hypoglycaemic agent at its therapeutic dose to the existing treatment regimen.

For subjects with an HbA1c between 8% and 11%, diabetic regimens could be changed after randomization to maintain glycaemic control.

Subjects received guideline-based diabetes control that was individually adapted to his/her comorbidity and risk profile.

10. Subjects determined to have mechanical hyperalgesia and/or cold allodynia on the basis of appropriate methodology. (A limited randomization of at least 38 subjects with either mechanical hyperalgesia and/or cold allodynia was planned.)

11. Women of non-child bearing potential who were post-menopausal or surgically sterile. Menopause was defined as 12 months of spontaneous amenorrhea with a serum follicular stimulating hormone (FSH) level >40 mIU/mL. Surgically sterile was defined by a documented hysterectomy and/or bilateral oophorectomy at least 6 weeks before screening. Documented tubal ligation did not meet the definition of surgically sterile.

12. Male subjects who agreed to use an acceptable form of contraception from the first dose of study medication until 90 days after the last dose of study medication. All sexually active males must agree to use a condom and meet at least 1 of the following conditions:

- Had a vasectomy for greater than 6 months;
- Had a female partner who met 1 of the following conditions: has had a bilateral tubal ligation, hysterectomy, or bilateral

4. Subjects with complex regional pain syndrome or trigeminal neuralgia.

5. Use of the following medications within 7 days of Visit 2 (the baseline pain intensity assessment):

- Antidepressants, anticonvulsants or mexiletine (exceptions: fluvoxamine, norfluoxetine, nefazodone, carbamazepine, barbiturates, phenytoin and oxcarbazepine as subjects on these medications at screening were excluded).
- Opioids or morphinomimetics
- Fatty acid supplements, primrose oil, myoinositol, chromium picolinate, alpha-lipoic acid, benfotiamine, and actovegin that are known to be used in neuropathic pain.
- Acetyl salicylic acid except up to 325 mg/day for myocardial infarction or transient ischaemic attack prophylaxis.
- Benzodiazepines other than indicated at low doses for sleep disorders.
- Lidocaine patch.
- Non-drug therapies or procedures (i.e. nerve blocks, trans-cutaneous electrical nerve stimulation [TENS]) for the relief of pain of DPN.

6. Use of herbal medication or supplements, St. John's wort, or grapefruit juice (more than 0.9 L/day) within 3 weeks prior to Visit 2.

7. Use of a capsaicin patch within 3 months before Screening.

8. Had a diabetic foot ulcer of ≤ 3 months duration. Subjects with a diabetic foot ulcer with > 3 months duration were included in the study only if the ulcer was stable for a period of at least 3 months prior to Screening.

9. Had a lower extremity amputation other than toes.

10. Had any of the following laboratory abnormalities, medical conditions, or disorders:

- Alanine aminotransferase (ALT) > 1.5x upper limit of normal (ULN) or direct bilirubin > 1.5x ULN.
- Chronic hepatitis B or C with a positive Hepatitis B surface antigen (HBsAg) or Hepatitis C core antigen antibody.
- Serum creatinine >150 µmol/L

|                                                                                                                                                                                                                                                                                                                                                                                                                                                                                                                                                                                                                                                                                                                                            |                                                                                                                                                                                                                                                                                                                                                                                                                                                                                                                                                                                                                                                                                                                                                                                                                                                                                                                                                                                                                                                                                                                                                                                                                                                                                                                                                                                                                                                                                                                                                                                                                                                                                                                                                                                                                                                                                                                                                                                                                                                        |
|--------------------------------------------------------------------------------------------------------------------------------------------------------------------------------------------------------------------------------------------------------------------------------------------------------------------------------------------------------------------------------------------------------------------------------------------------------------------------------------------------------------------------------------------------------------------------------------------------------------------------------------------------------------------------------------------------------------------------------------------|--------------------------------------------------------------------------------------------------------------------------------------------------------------------------------------------------------------------------------------------------------------------------------------------------------------------------------------------------------------------------------------------------------------------------------------------------------------------------------------------------------------------------------------------------------------------------------------------------------------------------------------------------------------------------------------------------------------------------------------------------------------------------------------------------------------------------------------------------------------------------------------------------------------------------------------------------------------------------------------------------------------------------------------------------------------------------------------------------------------------------------------------------------------------------------------------------------------------------------------------------------------------------------------------------------------------------------------------------------------------------------------------------------------------------------------------------------------------------------------------------------------------------------------------------------------------------------------------------------------------------------------------------------------------------------------------------------------------------------------------------------------------------------------------------------------------------------------------------------------------------------------------------------------------------------------------------------------------------------------------------------------------------------------------------------|
| <p>oophorectomy; was post-menopausal; or used one of the following forms of contraception:</p> <ul style="list-style-type: none"> <li>• Consistent use of oral, injected, or implanted hormonal methods of contraception.</li> <li>• Placement of intra-uterine device (IUD) or intra-uterine system (IUS).</li> <li>• Barrier methods only when used with spermicidal foam/gel/film/cream or suppository. Barrier methods such as condom or occlusive cap (diaphragm or cervical/vault caps) were acceptable.</li> </ul> <p>13. Male subjects (including those who had vasectomies) whose partners were pregnant agreed to use condoms from the first dose of study medication and until 90 days after last dose of study medication.</p> | <ul style="list-style-type: none"> <li>• Corrected QT (QTcP) interval of &gt; 430 msec in males or &gt; 450 msec in females. Note: A limited number of subjects who did not meet the QTc criteria (corrected by Bazett's method) in earlier version of the protocol were permitted to undergo rescreening in later versions of the protocol using Pfeuffer's method of QT correction.</li> <li>• Uncontrolled hypertension at screening (sitting systolic BP &gt; 160 mm Hg or sitting diastolic BP &gt; 90 mm Hg).</li> <li>• Current diagnosis of active epilepsy or any active seizure disorder requiring chronic therapy with antiepileptic drugs.</li> <li>• Patients with clinically significant or uncontrolled hepatic, gastrointestinal, cardiovascular, respiratory, neurological (other than neuropathy), psychiatric, hematological, renal, or dermatological disease, or any other medical condition that could, in the Investigator's medical judgment, interfere with the accurate assessment of safety or efficacy or could potentially affect a subject's safety or study outcome.</li> </ul> <p>11. Had participated in another study with an investigational compound within 90 days prior to study medication administration, or concurrent participation in another clinical study.</p> <p>12. Had major depression.</p> <p>13. Presence or history of cancer in the past 5 years with the exception of adequately treated, localised basal cell skin cancer or in situ uterine cervical cancer.</p> <p>14. HbA1c value &gt; 11%.</p> <p>15. Subjects taking strong or moderate inhibitors of cytochrome P450 CYP3A4 including oral/systemic ketoconazole, itraconazole, miconazole, clotrimazole, fluconazole, posaconazole, voriconazole, clarithromycin, erythromycin, ciprofloxacin, telithromycin, norfloxacin, chloramphenicol, fluvoxamine, norfluoxetine, nefazodone, verapamil, diltiazem, indinavir, nelfinavir, saquinavir, ritonavir, amprenavir, lopinavir, atazanavir, darunavir, aprepitant, and cyclosporine.</p> |
|--------------------------------------------------------------------------------------------------------------------------------------------------------------------------------------------------------------------------------------------------------------------------------------------------------------------------------------------------------------------------------------------------------------------------------------------------------------------------------------------------------------------------------------------------------------------------------------------------------------------------------------------------------------------------------------------------------------------------------------------|--------------------------------------------------------------------------------------------------------------------------------------------------------------------------------------------------------------------------------------------------------------------------------------------------------------------------------------------------------------------------------------------------------------------------------------------------------------------------------------------------------------------------------------------------------------------------------------------------------------------------------------------------------------------------------------------------------------------------------------------------------------------------------------------------------------------------------------------------------------------------------------------------------------------------------------------------------------------------------------------------------------------------------------------------------------------------------------------------------------------------------------------------------------------------------------------------------------------------------------------------------------------------------------------------------------------------------------------------------------------------------------------------------------------------------------------------------------------------------------------------------------------------------------------------------------------------------------------------------------------------------------------------------------------------------------------------------------------------------------------------------------------------------------------------------------------------------------------------------------------------------------------------------------------------------------------------------------------------------------------------------------------------------------------------------|

|  |                                                                                                                                                                                                                                                                                                                                                                                                                                                                                                                                                                                                                                                                                                                                                                                                      |
|--|------------------------------------------------------------------------------------------------------------------------------------------------------------------------------------------------------------------------------------------------------------------------------------------------------------------------------------------------------------------------------------------------------------------------------------------------------------------------------------------------------------------------------------------------------------------------------------------------------------------------------------------------------------------------------------------------------------------------------------------------------------------------------------------------------|
|  | <p>16. Subjects taking inducers of CYP3A4, including rifabutin, rifampin, pioglitazone, carbamazepine, dexamethasone, barbiturates, phenytoin, and oxcarbazepine.</p> <p>17. Subjects taking statins who had abnormal creatine kinase (CK) levels and subjects receiving combination therapy of statin with fibrate or statin with niacin. Subjects taking statins who had normal CK levels could be enrolled but were advised to maintain a stable lifestyle throughout the study, with no intensive physical activity.</p> <p>18. Had undergone gastrointestinal surgery that could affect absorption of the investigational product (eg, bariatric surgery).</p> <p>19. Had contraindications to rescue medications.</p> <p>20. Had a history of human immunodeficiency virus (HIV) exposure.</p> |
|  |                                                                                                                                                                                                                                                                                                                                                                                                                                                                                                                                                                                                                                                                                                                                                                                                      |

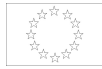

**Clinical trial results:**  
**A Phase 2, 4 Week Randomized, Double-Blind, Parallel Group,  
 Placebo Controlled Proof of Concept Study to Evaluate Efficacy,  
 Safety and Tolerability of GRC 17536 in Patients with Painful  
 Diabetic Peripheral Neuropathy**

These results have been removed from public view whilst they are reviewed and may need to be corrected before being returned to public view

### Summary

|                          |                |
|--------------------------|----------------|
| EudraCT number           | 2012-002320-33 |
| Trial protocol           | DE GB CZ       |
| Global end of trial date | 23 July 2014   |

### Results information

|                                |              |
|--------------------------------|--------------|
| Result version number          | v1           |
| This version publication date  | 24 July 2015 |
| First version publication date | 24 July 2015 |

### Trial information

#### Trial identification

|                       |               |
|-----------------------|---------------|
| Sponsor protocol code | GRC 17536-203 |
|-----------------------|---------------|

#### Additional study identifiers

|                                    |   |
|------------------------------------|---|
| ISRCTN number                      | - |
| ClinicalTrials.gov id (NCT number) | - |
| WHO universal trial number (UTN)   | - |

Notes:

### Sponsors

|                              |                                                                                                           |
|------------------------------|-----------------------------------------------------------------------------------------------------------|
| Sponsor organisation name    | Glenmark Pharmaceuticals S.A                                                                              |
| Sponsor organisation address | Chemin de la Combeta, 5, Ch-2300 , La Chaux-de-fonds, Switzerland,                                        |
| Public contact               | Dr. Shailendra Sachan, Glenmark Pharmaceuticals S.A, +91 2267720000, Shailendra.Sachan@glenmarkpharma.com |
| Scientific contact           | Dr. Monika Tandon, Glenmark Pharmaceuticals S.A, +91 2267720000, Monika.Tandon@glenmarkpharma.com         |

Notes:

### Paediatric regulatory details

|                                                                      |    |
|----------------------------------------------------------------------|----|
| Is trial part of an agreed paediatric investigation plan (PIP)       | No |
| Does article 45 of REGULATION (EC) No 1901/2006 apply to this trial? | No |
| Does article 46 of REGULATION (EC) No 1901/2006 apply to this trial? | No |

Notes:

## Results analysis stage

|                                                      |              |
|------------------------------------------------------|--------------|
| Analysis stage                                       | Final        |
| Date of interim/final analysis                       | 04 May 2015  |
| Is this the analysis of the primary completion data? | Yes          |
| Primary completion date                              | 23 July 2014 |
| Global end of trial reached?                         | Yes          |
| Global end of trial date                             | 23 July 2014 |
| Was the trial ended prematurely?                     | No           |

Notes:

## General information about the trial

Main objective of the trial:

To assess the efficacy of GRC 17536 in the treatment of pain associated with diabetic peripheral neuropathy

Protection of trial subjects:

In the interests of subject safety and acceptable standards of medical care the Investigator was permitted to prescribe treatment(s) at his/her discretion. All treatments taken by the subjects during the study were recorded in the subjects' CRF (medication, dose, treatment duration and indication).

Background therapy: -

Evidence for comparator: -

|                                                           |                  |
|-----------------------------------------------------------|------------------|
| Actual start date of recruitment                          | 20 December 2012 |
| Long term follow-up planned                               | No               |
| Independent data monitoring committee (IDMC) involvement? | No               |

Notes:

## Population of trial subjects

### Subjects enrolled per country

|                                      |                    |
|--------------------------------------|--------------------|
| Country: Number of subjects enrolled | Czech Republic: 18 |
| Country: Number of subjects enrolled | Germany: 6         |
| Country: Number of subjects enrolled | India: 114         |
| Worldwide total number of subjects   | 138                |
| EEA total number of subjects         | 24                 |

Notes:

### Subjects enrolled per age group

|                                           |     |
|-------------------------------------------|-----|
| In utero                                  | 0   |
| Preterm newborn - gestational age < 37 wk | 0   |
| Newborns (0-27 days)                      | 0   |
| Infants and toddlers (28 days-23 months)  | 0   |
| Children (2-11 years)                     | 0   |
| Adolescents (12-17 years)                 | 0   |
| Adults (18-64 years)                      | 126 |
| From 65 to 84 years                       | 12  |
| 85 years and over                         | 0   |

## Subject disposition

### Recruitment

Recruitment details:

Date of first patient enrollment: 20 Dec 2012

Date of last patient completed: 23 Jul 2014

Countries: Czech Republic, Germany, India

### Pre-assignment

Screening details:

Screening period: 2-week screening and washout period, Patients with painful diabetic peripheral neuropathy

### Period 1

|                              |                                                        |
|------------------------------|--------------------------------------------------------|
| Period 1 title               | GRC 17536 Vs Placebo (overall period)                  |
| Is this the baseline period? | Yes                                                    |
| Allocation method            | Randomised - controlled                                |
| Blinding used                | Double blind                                           |
| Roles blinded                | Subject, Investigator, Monitor, Data analyst, Assessor |

### Arms

|                              |     |
|------------------------------|-----|
| Are arms mutually exclusive? | Yes |
|------------------------------|-----|

|                  |                  |
|------------------|------------------|
| <b>Arm title</b> | GRC 17536 250 mg |
|------------------|------------------|

Arm description:

GRC 17536 250 mg administered BID orally for 28 days.

|                                        |                  |
|----------------------------------------|------------------|
| Arm type                               | Experimental     |
| Investigational medicinal product name | GRC 17536 250 mg |
| Investigational medicinal product code |                  |
| Other name                             |                  |
| Pharmaceutical forms                   | Granules         |
| Routes of administration               | Oral use         |

Dosage and administration details:

GRC 17536 250 mg administered orally, BID, for 28 days.

|                  |         |
|------------------|---------|
| <b>Arm title</b> | Placebo |
|------------------|---------|

Arm description:

Placebo to match investigational product, administered BID orally for 28 days.

|                                        |          |
|----------------------------------------|----------|
| Arm type                               | Placebo  |
| Investigational medicinal product name | Placebo  |
| Investigational medicinal product code |          |
| Other name                             |          |
| Pharmaceutical forms                   | Granules |
| Routes of administration               | Oral use |

Dosage and administration details:

Placebo administered BID orally for 28 days.

| <b>Number of subjects in period 1</b> | GRC 17536 250 mg | Placebo |  |
|---------------------------------------|------------------|---------|--|
| Started                               | 72               | 66      |  |
| Completed                             | 64               | 61      |  |
| Not completed                         | 8                | 5       |  |
| Protocol deviation                    | 1                | -       |  |
| Physician decision                    | 2                | -       |  |
| Adverse event, non-fatal              | 1                | -       |  |
| Subject withdrawal                    | 4                | 5       |  |



## Baseline characteristics

### Reporting groups

|                              |                                                                                |
|------------------------------|--------------------------------------------------------------------------------|
| Reporting group title        | GRC 17536 250 mg                                                               |
| Reporting group description: | GRC 17536 250 mg administered BID orally for 28 days.                          |
| Reporting group title        | Placebo                                                                        |
| Reporting group description: | Placebo to match investigational product, administered BID orally for 28 days. |

| Reporting group values                             | GRC 17536 250 mg | Placebo | Total |
|----------------------------------------------------|------------------|---------|-------|
| Number of subjects                                 | 72               | 66      | 138   |
| Age categorical                                    |                  |         |       |
| Units: Subjects                                    |                  |         |       |
| In utero                                           | 0                | 0       | 0     |
| Preterm newborn infants (gestational age < 37 wks) | 0                | 0       | 0     |
| Newborns (0-27 days)                               | 0                | 0       | 0     |
| Infants and toddlers (28 days-23 months)           | 0                | 0       | 0     |
| Children (2-11 years)                              | 0                | 0       | 0     |
| Adolescents (12-17 years)                          | 0                | 0       | 0     |
| Adults (18-64 years)                               | 0                | 0       | 0     |
| From 65-84 years                                   | 0                | 0       | 0     |
| 85 years and over                                  | 0                | 0       | 0     |
| Adults (18-75 years)                               | 72               | 66      | 138   |
| Age continuous                                     |                  |         |       |
| Units: years                                       |                  |         |       |
| arithmetic mean                                    | 56.07            | 56.11   |       |
| standard deviation                                 | ± 8.57           | ± 8.53  | -     |
| Gender categorical                                 |                  |         |       |
| Units: Subjects                                    |                  |         |       |
| Female                                             | 19               | 23      | 42    |
| Male                                               | 53               | 43      | 96    |

### Subject analysis sets

|                                                                                                                                                                                                                                                                                                         |                    |
|---------------------------------------------------------------------------------------------------------------------------------------------------------------------------------------------------------------------------------------------------------------------------------------------------------|--------------------|
| Subject analysis set title                                                                                                                                                                                                                                                                              | GRC 17536 250 mg   |
| Subject analysis set type                                                                                                                                                                                                                                                                               | Intention-to-treat |
| Subject analysis set description:                                                                                                                                                                                                                                                                       |                    |
| 1. Intent-to-Treat (ITT) population was defined as all randomized subjects with non-missing API score at baseline, who received at least 1 dose of randomized study medication, and had an API score from at least 1 post-baseline visit (inclusive of 4 days of data).                                 |                    |
| 2. Exploratory analysis was performed in the non-denervation group with moderate to severe pain [ITT population excluding subjects with a baseline mean 24-hour API score <5 based on NRS and excluding subjects with cold detection threshold (CDT) <18°C and/or warm detection threshold (WDT) >49°C] |                    |
| Subject analysis set title                                                                                                                                                                                                                                                                              | Placebo            |
| Subject analysis set type                                                                                                                                                                                                                                                                               | Intention-to-treat |

Subject analysis set description:

1. Intent-to-Treat (ITT) population was defined as all randomized subjects with non-missing API score at

baseline, who received at least 1 dose of randomized study medication, and had an API score from at least 1 post-baseline visit (inclusive of 4 days of data).

2. Exploratory analysis was performed in the non-denervation group with moderate to severe pain [ITT population excluding subjects with a baseline mean 24-hour API score <5 based on NRS and excluding subjects with cold detection threshold (CDT) <18°C and/or warm detection threshold (WDT) >49°C]

| <b>Reporting group values</b>                         | GRC 17536 250 mg | Placebo |  |
|-------------------------------------------------------|------------------|---------|--|
| Number of subjects                                    | 70               | 66      |  |
| Age categorical                                       |                  |         |  |
| Units: Subjects                                       |                  |         |  |
| In utero                                              | 0                | 0       |  |
| Preterm newborn infants<br>(gestational age < 37 wks) | 0                | 0       |  |
| Newborns (0-27 days)                                  | 0                | 0       |  |
| Infants and toddlers (28 days-23<br>months)           | 0                | 0       |  |
| Children (2-11 years)                                 | 0                | 0       |  |
| Adolescents (12-17 years)                             | 0                | 0       |  |
| Adults (18-64 years)                                  | 0                | 0       |  |
| From 65-84 years                                      | 0                | 0       |  |
| 85 years and over                                     | 0                | 0       |  |
| Adults (18-75 years)                                  | 70               | 66      |  |
| Age continuous                                        |                  |         |  |
| Units: years                                          |                  |         |  |
| arithmetic mean                                       | 55.03            | 57.29   |  |
| standard deviation                                    | ± 9.46           | ± 7.5   |  |
| Gender categorical                                    |                  |         |  |
| Units: Subjects                                       |                  |         |  |
| Female                                                | 19               | 23      |  |
| Male                                                  | 51               | 43      |  |

## End points

### End points reporting groups

|                       |                  |
|-----------------------|------------------|
| Reporting group title | GRC 17536 250 mg |
|-----------------------|------------------|

Reporting group description:

GRC 17536 250 mg administered BID orally for 28 days.

|                       |         |
|-----------------------|---------|
| Reporting group title | Placebo |
|-----------------------|---------|

Reporting group description:

Placebo to match investigational product, administered BID orally for 28 days.

|                            |                  |
|----------------------------|------------------|
| Subject analysis set title | GRC 17536 250 mg |
|----------------------------|------------------|

|                           |                    |
|---------------------------|--------------------|
| Subject analysis set type | Intention-to-treat |
|---------------------------|--------------------|

Subject analysis set description:

1. Intent-to-Treat (ITT) population was defined as all randomized subjects with non-missing API score at baseline, who received at least 1 dose of randomized study medication, and had an API score from at least 1 post-baseline visit (inclusive of 4 days of data).

2. Exploratory analysis was performed in the non-denervation group with moderate to severe pain [ITT population excluding subjects with a baseline mean 24-hour API score <5 based on NRS and excluding subjects with cold detection threshold (CDT) <18°C and/or warm detection threshold (WDT) >49°C]

|                            |         |
|----------------------------|---------|
| Subject analysis set title | Placebo |
|----------------------------|---------|

|                           |                    |
|---------------------------|--------------------|
| Subject analysis set type | Intention-to-treat |
|---------------------------|--------------------|

Subject analysis set description:

1. Intent-to-Treat (ITT) population was defined as all randomized subjects with non-missing API score at baseline, who received at least 1 dose of randomized study medication, and had an API score from at least 1 post-baseline visit (inclusive of 4 days of data).

2. Exploratory analysis was performed in the non-denervation group with moderate to severe pain [ITT population excluding subjects with a baseline mean 24-hour API score <5 based on NRS and excluding subjects with cold detection threshold (CDT) <18°C and/or warm detection threshold (WDT) >49°C]

### Primary: Change from baseline to end of treatment (week 4) in the mean 24-hour average pain intensity (API) score

|                 |                                                                                                          |
|-----------------|----------------------------------------------------------------------------------------------------------|
| End point title | Change from baseline to end of treatment (week 4) in the mean 24-hour average pain intensity (API) score |
|-----------------|----------------------------------------------------------------------------------------------------------|

End point description:

|                |         |
|----------------|---------|
| End point type | Primary |
|----------------|---------|

End point timeframe:

4 weeks

| End point values                             | GRC 17536<br>250 mg    | Placebo                |  |  |
|----------------------------------------------|------------------------|------------------------|--|--|
| Subject group type                           | Subject analysis set   | Subject analysis set   |  |  |
| Number of subjects analysed                  | 70                     | 66                     |  |  |
| Units: number                                |                        |                        |  |  |
| least squares mean (confidence interval 95%) | -1.94 (-2.32 to -1.56) | -1.68 (-2.07 to -1.29) |  |  |

## Statistical analyses

|                                         |                                                   |
|-----------------------------------------|---------------------------------------------------|
| <b>Statistical analysis title</b>       | Statistical Analysis of Primary Efficacy Endpoint |
| Comparison groups                       | GRC 17536 250 mg v Placebo                        |
| Number of subjects included in analysis | 136                                               |
| Analysis specification                  | Pre-specified                                     |
| Analysis type                           | other <sup>[1]</sup>                              |
| Parameter estimate                      | Mean difference (final values)                    |
| Point estimate                          | -0.26                                             |
| Confidence interval                     |                                                   |
| level                                   | 95 %                                              |
| sides                                   | 2-sided                                           |
| lower limit                             | -0.81                                             |
| upper limit                             | 0.28                                              |

Notes:

[1] - ANCOVA

**Other pre-specified: Exploratory Analysis – Change from baseline to end of treatment (week 4) in the mean 24-hour average pain intensity (API) score (in non-denervation group with moderate to severe pain)**

|                 |                                                                                                                                                                                         |
|-----------------|-----------------------------------------------------------------------------------------------------------------------------------------------------------------------------------------|
| End point title | Exploratory Analysis – Change from baseline to end of treatment (week 4) in the mean 24-hour average pain intensity (API) score (in non-denervation group with moderate to severe pain) |
|-----------------|-----------------------------------------------------------------------------------------------------------------------------------------------------------------------------------------|

End point description:

Change from baseline to end of treatment (week 4) in the mean 24-hour average pain intensity (API) score in the non-denervation group with moderate to severe pain (ITT population excluding subjects with a baseline mean 24-hour API score <5 based on NRS and excluding subjects with CDT <18°C and/or WDT >49°C)

|                |                     |
|----------------|---------------------|
| End point type | Other pre-specified |
|----------------|---------------------|

End point timeframe:

Week 4

| <b>End point values</b>                      | GRC 17536<br>250 mg    | Placebo              |  |  |
|----------------------------------------------|------------------------|----------------------|--|--|
| Subject group type                           | Subject analysis set   | Subject analysis set |  |  |
| Number of subjects analysed                  | 30                     | 35                   |  |  |
| Units: Number                                |                        |                      |  |  |
| least squares mean (confidence interval 95%) | -2.48 (-3.01 to -1.95) | -1.52 (-2 to -1.04)  |  |  |

**Statistical analyses**

|                                         |                            |
|-----------------------------------------|----------------------------|
| <b>Statistical analysis title</b>       | Exploratory Analysis       |
| Comparison groups                       | GRC 17536 250 mg v Placebo |
| Number of subjects included in analysis | 65                         |
| Analysis specification                  | Pre-specified              |
| Analysis type                           | other                      |
| P-value                                 | = 0.009                    |
| Method                                  | Mixed models analysis      |

|                     |                                |
|---------------------|--------------------------------|
| Parameter estimate  | Mean difference (final values) |
| Point estimate      | -0.96                          |
| Confidence interval |                                |
| level               | 95 %                           |
| sides               | 2-sided                        |
| lower limit         | -1.68                          |
| upper limit         | -0.24                          |

## Adverse events

### Adverse events information

Timeframe for reporting adverse events:

9 weeks

|                 |            |
|-----------------|------------|
| Assessment type | Systematic |
|-----------------|------------|

### Dictionary used

|                 |        |
|-----------------|--------|
| Dictionary name | MedDRA |
|-----------------|--------|

|                    |      |
|--------------------|------|
| Dictionary version | 14.1 |
|--------------------|------|

### Reporting groups

|                       |                  |
|-----------------------|------------------|
| Reporting group title | GRC 17536 250 mg |
|-----------------------|------------------|

Reporting group description:

GRC 17536 250 mg administered BID orally for 28 days.

|                       |         |
|-----------------------|---------|
| Reporting group title | Placebo |
|-----------------------|---------|

Reporting group description:

Placebo administered BID orally for 28 days.

| <b>Serious adverse events</b>                        | GRC 17536 250 mg | Placebo        |  |
|------------------------------------------------------|------------------|----------------|--|
| Total subjects affected by serious adverse events    |                  |                |  |
| subjects affected / exposed                          | 1 / 72 (1.39%)   | 0 / 66 (0.00%) |  |
| number of deaths (all causes)                        | 0                | 0              |  |
| number of deaths resulting from adverse events       | 0                | 0              |  |
| General disorders and administration site conditions |                  |                |  |
| Pyrexia                                              |                  |                |  |
| subjects affected / exposed                          | 1 / 72 (1.39%)   | 0 / 66 (0.00%) |  |
| occurrences causally related to treatment / all      | 0 / 1            | 0 / 0          |  |
| deaths causally related to treatment / all           | 0 / 0            | 0 / 0          |  |

Frequency threshold for reporting non-serious adverse events: 5 %

| <b>Non-serious adverse events</b>                     | GRC 17536 250 mg | Placebo          |  |
|-------------------------------------------------------|------------------|------------------|--|
| Total subjects affected by non-serious adverse events |                  |                  |  |
| subjects affected / exposed                           | 23 / 72 (31.94%) | 25 / 66 (37.88%) |  |
| Vascular disorders                                    |                  |                  |  |
| Haemorrhage                                           |                  |                  |  |
| subjects affected / exposed                           | 0 / 72 (0.00%)   | 1 / 66 (1.52%)   |  |
| occurrences (all)                                     | 0                | 1                |  |
| Hypertension                                          |                  |                  |  |
| subjects affected / exposed                           | 1 / 72 (1.39%)   | 0 / 66 (0.00%)   |  |

|                                                      |                |                |  |
|------------------------------------------------------|----------------|----------------|--|
| occurrences (all)                                    | 1              | 0              |  |
| Hypotension                                          |                |                |  |
| subjects affected / exposed                          | 1 / 72 (1.39%) | 0 / 66 (0.00%) |  |
| occurrences (all)                                    | 1              | 0              |  |
| Surgical and medical procedures                      |                |                |  |
| Tooth extraction                                     |                |                |  |
| subjects affected / exposed                          | 1 / 72 (1.39%) | 0 / 66 (0.00%) |  |
| occurrences (all)                                    | 1              | 0              |  |
| General disorders and administration site conditions |                |                |  |
| Fatigue                                              |                |                |  |
| subjects affected / exposed                          | 1 / 72 (1.39%) | 0 / 66 (0.00%) |  |
| occurrences (all)                                    | 1              | 0              |  |
| Local swelling                                       |                |                |  |
| subjects affected / exposed                          | 0 / 72 (0.00%) | 1 / 66 (1.52%) |  |
| occurrences (all)                                    | 0              | 1              |  |
| Oedema peripheral                                    |                |                |  |
| subjects affected / exposed                          | 1 / 72 (1.39%) | 0 / 66 (0.00%) |  |
| occurrences (all)                                    | 1              | 0              |  |
| Pain                                                 |                |                |  |
| subjects affected / exposed                          | 2 / 72 (2.78%) | 0 / 66 (0.00%) |  |
| occurrences (all)                                    | 2              | 0              |  |
| Pyrexia                                              |                |                |  |
| subjects affected / exposed                          | 0 / 72 (0.00%) | 2 / 66 (3.03%) |  |
| occurrences (all)                                    | 0              | 2              |  |
| Psychiatric disorders                                |                |                |  |
| Anxiety                                              |                |                |  |
| subjects affected / exposed                          | 1 / 72 (1.39%) | 0 / 66 (0.00%) |  |
| occurrences (all)                                    | 1              | 0              |  |
| Injury, poisoning and procedural complications       |                |                |  |
| Contusion                                            |                |                |  |
| subjects affected / exposed                          | 1 / 72 (1.39%) | 0 / 66 (0.00%) |  |
| occurrences (all)                                    | 1              | 0              |  |
| Investigations                                       |                |                |  |
| Alanine aminotransferase increased                   |                |                |  |
| subjects affected / exposed                          | 1 / 72 (1.39%) | 1 / 66 (1.52%) |  |
| occurrences (all)                                    | 1              | 1              |  |

|                                                 |                |                |  |
|-------------------------------------------------|----------------|----------------|--|
| Aspartate aminotransferase increased            |                |                |  |
| subjects affected / exposed                     | 1 / 72 (1.39%) | 1 / 66 (1.52%) |  |
| occurrences (all)                               | 1              | 1              |  |
| Blood creatine phosphokinase abnormal           |                |                |  |
| subjects affected / exposed                     | 1 / 72 (1.39%) | 0 / 66 (0.00%) |  |
| occurrences (all)                               | 1              | 0              |  |
| Blood creatine phosphokinase increased          |                |                |  |
| subjects affected / exposed                     | 1 / 72 (1.39%) | 3 / 66 (4.55%) |  |
| occurrences (all)                               | 1              | 3              |  |
| Blood potassium increased                       |                |                |  |
| subjects affected / exposed                     | 2 / 72 (2.78%) | 2 / 66 (3.03%) |  |
| occurrences (all)                               | 2              | 2              |  |
| Blood sodium decreased                          |                |                |  |
| subjects affected / exposed                     | 1 / 72 (1.39%) | 0 / 66 (0.00%) |  |
| occurrences (all)                               | 1              | 0              |  |
| Urine analysis abnormal                         |                |                |  |
| subjects affected / exposed                     | 1 / 72 (1.39%) | 1 / 66 (1.52%) |  |
| occurrences (all)                               | 1              | 1              |  |
| Blood and lymphatic system disorders            |                |                |  |
| Iron deficiency anaemia                         |                |                |  |
| subjects affected / exposed                     | 1 / 72 (1.39%) | 0 / 66 (0.00%) |  |
| occurrences (all)                               | 1              | 0              |  |
| Leukocytosis                                    |                |                |  |
| subjects affected / exposed                     | 0 / 72 (0.00%) | 1 / 66 (1.52%) |  |
| occurrences (all)                               | 0              | 1              |  |
| Neutrophilia                                    |                |                |  |
| subjects affected / exposed                     | 0 / 72 (0.00%) | 1 / 66 (1.52%) |  |
| occurrences (all)                               | 0              | 1              |  |
| Respiratory, thoracic and mediastinal disorders |                |                |  |
| Throat irritation                               |                |                |  |
| subjects affected / exposed                     | 1 / 72 (1.39%) | 3 / 66 (4.55%) |  |
| occurrences (all)                               | 1              | 3              |  |
| Nervous system disorders                        |                |                |  |



|                                                                          |                     |                     |  |
|--------------------------------------------------------------------------|---------------------|---------------------|--|
| Ageusia<br>subjects affected / exposed<br>occurrences (all)              | 1 / 72 (1.39%)<br>1 | 0 / 66 (0.00%)<br>0 |  |
| Dysgeusia<br>subjects affected / exposed<br>occurrences (all)            | 2 / 72 (2.78%)<br>2 | 1 / 66 (1.52%)<br>1 |  |
| Headache<br>subjects affected / exposed<br>occurrences (all)             | 1 / 72 (1.39%)<br>1 | 0 / 66 (0.00%)<br>0 |  |
| Hypogeusia<br>subjects affected / exposed<br>occurrences (all)           | 0 / 72 (0.00%)<br>0 | 1 / 66 (1.52%)<br>1 |  |
| Eye disorders                                                            |                     |                     |  |
| Cataract<br>subjects affected / exposed<br>occurrences (all)             | 0 / 72 (0.00%)<br>0 | 1 / 66 (1.52%)<br>1 |  |
| Dry eye<br>subjects affected / exposed<br>occurrences (all)              | 0 / 72 (0.00%)<br>0 | 1 / 66 (1.52%)<br>1 |  |
| Gastrointestinal disorders                                               |                     |                     |  |
| Abdominal distension<br>subjects affected / exposed<br>occurrences (all) | 1 / 72 (1.39%)<br>1 | 2 / 66 (3.03%)<br>2 |  |
| Diarrhoea<br>subjects affected / exposed<br>occurrences (all)            | 2 / 72 (2.78%)<br>2 | 0 / 66 (0.00%)<br>0 |  |
| Dyspepsia<br>subjects affected / exposed<br>occurrences (all)            | 2 / 72 (2.78%)<br>2 | 3 / 66 (4.55%)<br>3 |  |
| Dysphagia<br>subjects affected / exposed<br>occurrences (all)            | 0 / 72 (0.00%)<br>0 | 1 / 66 (1.52%)<br>1 |  |
| Gastric ulcer<br>subjects affected / exposed<br>occurrences (all)        | 0 / 72 (0.00%)<br>0 | 1 / 66 (1.52%)<br>1 |  |
| Haemorrhoidal haemorrhage<br>subjects affected / exposed                 | 1 / 72 (1.39%)      | 0 / 66 (0.00%)      |  |

|                                                 |                |                |  |
|-------------------------------------------------|----------------|----------------|--|
| occurrences (all)                               | 1              | 0              |  |
| Hyperchlorhydria                                |                |                |  |
| subjects affected / exposed                     | 1 / 72 (1.39%) | 1 / 66 (1.52%) |  |
| occurrences (all)                               | 1              | 1              |  |
| Nausea                                          |                |                |  |
| subjects affected / exposed                     | 1 / 72 (1.39%) | 0 / 66 (0.00%) |  |
| occurrences (all)                               | 1              | 0              |  |
| Vomiting                                        |                |                |  |
| subjects affected / exposed                     | 1 / 72 (1.39%) | 0 / 66 (0.00%) |  |
| occurrences (all)                               | 1              | 0              |  |
| Renal and urinary disorders                     |                |                |  |
| Diabetic nephropathy                            |                |                |  |
| subjects affected / exposed                     | 1 / 72 (1.39%) | 0 / 66 (0.00%) |  |
| occurrences (all)                               | 1              | 0              |  |
| Glycosuria                                      |                |                |  |
| subjects affected / exposed                     | 0 / 72 (0.00%) | 1 / 66 (1.52%) |  |
| occurrences (all)                               | 0              | 1              |  |
| Pollakiuria                                     |                |                |  |
| subjects affected / exposed                     | 1 / 72 (1.39%) | 0 / 66 (0.00%) |  |
| occurrences (all)                               | 1              | 0              |  |
| Proteinuria                                     |                |                |  |
| subjects affected / exposed                     | 0 / 72 (0.00%) | 2 / 66 (3.03%) |  |
| occurrences (all)                               | 0              | 2              |  |
| Renal impairment                                |                |                |  |
| subjects affected / exposed                     | 0 / 72 (0.00%) | 1 / 66 (1.52%) |  |
| occurrences (all)                               | 0              | 1              |  |
| Skin and subcutaneous tissue disorders          |                |                |  |
| Skin hypopigmentation                           |                |                |  |
| subjects affected / exposed                     | 0 / 72 (0.00%) | 1 / 66 (1.52%) |  |
| occurrences (all)                               | 0              | 1              |  |
| Musculoskeletal and connective tissue disorders |                |                |  |
| Back pain                                       |                |                |  |
| subjects affected / exposed                     | 1 / 72 (1.39%) | 1 / 66 (1.52%) |  |
| occurrences (all)                               | 1              | 1              |  |
| Pain in extremity                               |                |                |  |
| subjects affected / exposed                     | 0 / 72 (0.00%) | 1 / 66 (1.52%) |  |

|                                           |                |                |  |
|-------------------------------------------|----------------|----------------|--|
| occurrences (all)                         | 0              | 1              |  |
| <b>Metabolism and nutrition disorders</b> |                |                |  |
| Decreased appetite                        |                |                |  |
| subjects affected / exposed               | 0 / 72 (0.00%) | 1 / 66 (1.52%) |  |
| occurrences (all)                         | 0              | 1              |  |
| Dyslipidaemia                             |                |                |  |
| subjects affected / exposed               | 0 / 72 (0.00%) | 1 / 66 (1.52%) |  |
| occurrences (all)                         | 0              | 1              |  |
| Hyperglycaemia                            |                |                |  |
| subjects affected / exposed               | 2 / 72 (2.78%) | 2 / 66 (3.03%) |  |
| occurrences (all)                         | 2              | 2              |  |
| Hypoglycaemia                             |                |                |  |
| subjects affected / exposed               | 0 / 72 (0.00%) | 3 / 66 (4.55%) |  |
| occurrences (all)                         | 0              | 3              |  |
| Hyponatraemia                             |                |                |  |
| subjects affected / exposed               | 0 / 72 (0.00%) | 1 / 66 (1.52%) |  |
| occurrences (all)                         | 0              | 1              |  |
| Impaired fasting glucose                  |                |                |  |
| subjects affected / exposed               | 1 / 72 (1.39%) | 0 / 66 (0.00%) |  |
| occurrences (all)                         | 1              | 0              |  |
| <b>Infections and infestations</b>        |                |                |  |
| Nasopharyngitis                           |                |                |  |
| subjects affected / exposed               | 0 / 72 (0.00%) | 1 / 66 (1.52%) |  |
| occurrences (all)                         | 0              | 1              |  |
| Pharyngitis                               |                |                |  |
| subjects affected / exposed               | 0 / 72 (0.00%) | 1 / 66 (1.52%) |  |
| occurrences (all)                         | 0              | 1              |  |

## More information

### Substantial protocol amendments (globally)

Were there any global substantial amendments to the protocol? Yes

| Date             | Amendment                                                                                                                                                                                                                                                                                                                                                |
|------------------|----------------------------------------------------------------------------------------------------------------------------------------------------------------------------------------------------------------------------------------------------------------------------------------------------------------------------------------------------------|
| 25 October 2012  | Following change was made in the Protocol Version 3.0 (Germany only), 25 Oct 2012:<br>-ALT/AST based treatment stopping rule.                                                                                                                                                                                                                            |
| 22 February 2013 | Following changes were made in the Protocol Version 5.0 (Germany only), 22 Feb 2013:<br>- Corrected QT (QTc) interval of >430 msec in males or >450 msec in females according to the method described by Pfeufer et al.<br>- Change in the baseline 24-hour average daily pain intensity score at study entry from $\geq 5$ and < 9 to $\geq 4$ and < 9. |
| 26 February 2013 | Following changes were made in the Protocol Version 4.0, 26 Feb 2013:<br>- Corrected QT (QTc) interval of >430 msec in males or >450 msec in females according to the method described by Pfeufer et al.<br>- Change in the baseline 24-hour average daily pain intensity score at study entry from $\geq 5$ and < 9 to $\geq 4$ and < 9.                |
| 01 March 2013    | Following changes were made in the Protocol Version 4.0 (India only), 01 Mar 2013:<br>- Corrected QT (QTc) interval of >430 msec in males or >450 msec in females according to the method described by Pfeufer et al.<br>- Change in the baseline 24-hour average daily pain intensity score at study entry from $\geq 5$ and < 9 to $\geq 4$ and < 9.   |

Notes:

---

### Interruptions (globally)

Were there any global interruptions to the trial? No

### Limitations and caveats

None reported
